# Supplementary material
Source: PubMed Central journal article supplement (PMC7894074)
Supplement: mmc1.pdf [file mmc1.pdf]

# Virtual Surgery for Pediatric Surgery

Please complete the survey below.

Thank you!

**In reference to your appointment today, please provide estimates for the following questions:**

Total miles traveled (round-trip):

- less than 20 miles
- 20-40 miles
- 40-60 miles
- 60-100 miles
- more than 100 miles

Time spent traveling (round-trip):

- less than 30 minutes
- 30 minutes to 1 hour
- 1-2 hours
- 2-3 hours
- more than 3 hours

Cost of travel (round-trip):

- less than \$10
- \$10-20
- \$20-30
- \$30-50
- more than \$50

Additional costs related to today's visit (food, lodging, child care, etc.)

- less than \$10
- \$10-20
- \$20-30
- \$30-50
- more than \$50

How many visits with a surgeon has your child required in the last year? Please count any time that you had to visit the surgeon's office and/or the hospital as 1 visit.

- 1
- 2
- 3
- 4
- 5
- 6
- 7
- 8 or more

Did you have to miss time from work to attend your child's doctor appointment today?

Yes  No

Did another adult have to miss time from work in order for your child to attend his/her doctor's appointment today?

Yes  No

Are you or another adult losing wages due to time missed for your child's doctor appointment today?

Yes  No

Please provide the zip code for where you currently reside

\_\_\_\_\_

Do you have access to a computer or tablet (iPad, Notebook, etc)?

Yes  No

**How often do you use your computer or tablet to do the following:**

|                                              | Never                 | Monthly or Less       | Weekly                | Daily                 |
|----------------------------------------------|-----------------------|-----------------------|-----------------------|-----------------------|
| Access the Internet                          | <input type="radio"/> | <input type="radio"/> | <input type="radio"/> | <input type="radio"/> |
| Sent/Receive an Email                        | <input type="radio"/> | <input type="radio"/> | <input type="radio"/> | <input type="radio"/> |
| Upload a Photograph                          | <input type="radio"/> | <input type="radio"/> | <input type="radio"/> | <input type="radio"/> |
| Access Social Media                          | <input type="radio"/> | <input type="radio"/> | <input type="radio"/> | <input type="radio"/> |
| Use Video Chat (FaceTime, Viber, Skype, etc) | <input type="radio"/> | <input type="radio"/> | <input type="radio"/> | <input type="radio"/> |
| Search for Health Information                | <input type="radio"/> | <input type="radio"/> | <input type="radio"/> | <input type="radio"/> |

Do you have a cell phone?  Yes  No

**How often do you use your cell phone to do the following:**

|                                              | Never                 | Monthly or Less       | Weekly                | Daily                 |
|----------------------------------------------|-----------------------|-----------------------|-----------------------|-----------------------|
| Access the Internet                          | <input type="radio"/> | <input type="radio"/> | <input type="radio"/> | <input type="radio"/> |
| Send/Receive an Email                        | <input type="radio"/> | <input type="radio"/> | <input type="radio"/> | <input type="radio"/> |
| Upload a Photograph                          | <input type="radio"/> | <input type="radio"/> | <input type="radio"/> | <input type="radio"/> |
| Access Social Media                          | <input type="radio"/> | <input type="radio"/> | <input type="radio"/> | <input type="radio"/> |
| Use Video Chat (FaceTime, Viber, Skype, etc) | <input type="radio"/> | <input type="radio"/> | <input type="radio"/> | <input type="radio"/> |
| Search for Health Information                | <input type="radio"/> | <input type="radio"/> | <input type="radio"/> | <input type="radio"/> |

**How comfortable do you feel you would be communicating about medical issues through the following:**

|                    | Extremely Uncomfortably | Uncomfortable         | Not Sure              | Comfortable           | Extremely Comfortable |
|--------------------|-------------------------|-----------------------|-----------------------|-----------------------|-----------------------|
| Email              | <input type="radio"/>   | <input type="radio"/> | <input type="radio"/> | <input type="radio"/> | <input type="radio"/> |
| Telephone          | <input type="radio"/>   | <input type="radio"/> | <input type="radio"/> | <input type="radio"/> | <input type="radio"/> |
| Video Conferencing | <input type="radio"/>   | <input type="radio"/> | <input type="radio"/> | <input type="radio"/> | <input type="radio"/> |

Have you ever heard of telemedicine?  Yes  No

Telemedicine is a secure way to share information with a physician without having to travel to his/her office. It would allow your primary care physician to send photos and other information to the surgeon securely, but would not include a physical exam or in-person encounter.

**Would you feel comfortable communicating with your surgeon via any of the following:**

|              | Yes                   | No                    | Not Sure              |
|--------------|-----------------------|-----------------------|-----------------------|
| Email        | <input type="radio"/> | <input type="radio"/> | <input type="radio"/> |
| Telephone    | <input type="radio"/> | <input type="radio"/> | <input type="radio"/> |
| Telemedicine | <input type="radio"/> | <input type="radio"/> | <input type="radio"/> |

**How important are the following when considering your appointment with a surgeon:**

|                                                  | Very Unimportant      | Somewhat Unimportant  | Not Sure              | Somewhat Important    | Very Important        |
|--------------------------------------------------|-----------------------|-----------------------|-----------------------|-----------------------|-----------------------|
| Minimizing Cost                                  | <input type="radio"/> |
| Minimizing Time Spent on Travel                  | <input type="radio"/> |
| Getting the Correct Diagnosis/Scheduling Surgery | <input type="radio"/> |
| Receiving Communication from the Surgeon         | <input type="radio"/> |
| Being Able to Ask Questions Directly             | <input type="radio"/> |
| Seeing the Surgeon In-Person                     | <input type="radio"/> |

**How likely would you be to use telemedicine for the following types of appointments:**

|                                                   | Very Unlikely         | Unlikely              | Likely                | Very Likely           |
|---------------------------------------------------|-----------------------|-----------------------|-----------------------|-----------------------|
| Pre-Operative Visit (Before Scheduling Surgery)   | <input type="radio"/> | <input type="radio"/> | <input type="radio"/> | <input type="radio"/> |
| Post-Operative Visit (After Surgery is Performed) | <input type="radio"/> | <input type="radio"/> | <input type="radio"/> | <input type="radio"/> |

Please provide any comments/concerns regarding your thoughts on a Virtual Surgery Clinic:

---

# Virtual Surgery for Pediatric Surgery

Telemedicine is a secure way to share information with a physician without having to travel to his/her office. It would allow your primary care physician to send photos and other information to the surgeon securely, but would not include a physical exam or in-person encounter.

## Would you feel comfortable communication with your surgeon via the following:

|              | Yes                   | No                    | Not Sure              |
|--------------|-----------------------|-----------------------|-----------------------|
| Email        | <input type="radio"/> | <input type="radio"/> | <input type="radio"/> |
| Telephone    | <input type="radio"/> | <input type="radio"/> | <input type="radio"/> |
| Telemedicine | <input type="radio"/> | <input type="radio"/> | <input type="radio"/> |

## How important are the following when considering your appointment with a surgeon:

|                                                  | Very Unimportant      | Somewhat Unimportant  | Not Sure              | Somewhat Important    | Very Important        |
|--------------------------------------------------|-----------------------|-----------------------|-----------------------|-----------------------|-----------------------|
| Getting the Correct Diagnosis/Scheduling Surgery | <input type="radio"/> |
| Receiving Communication from the Surgeon         | <input type="radio"/> |
| Minimizing Time Spent on Travel                  | <input type="radio"/> |
| Minimizing Cost                                  | <input type="radio"/> |
| Being Able to Ask Questions Directly             | <input type="radio"/> |
| Seeing the Surgeon In-Person                     | <input type="radio"/> |

## How likely would you be to use telemedicine for the following types of appointments:

|                                                   | Very Unlikely         | Unlikely              | Likely                | Very Likely           |
|---------------------------------------------------|-----------------------|-----------------------|-----------------------|-----------------------|
| Pre-Operative Visit (Before Scheduling Surgery)   | <input type="radio"/> | <input type="radio"/> | <input type="radio"/> | <input type="radio"/> |
| Post-Operative Visit (After Surgery is Performed) | <input type="radio"/> | <input type="radio"/> | <input type="radio"/> | <input type="radio"/> |

Please provide any comments/concerns regarding your thoughts on a Virtual Surgery Clinic:

---

# Health Literacy Survey

---

How often do you have someone help you read hospital materials?

- Always  Often  Sometimes  Occasionally  Never

---

How often do you have problems learning about your (child's) medical condition because of difficulty understanding written information?

- Always  Often  Sometimes  Occasionally  Never

---

How often do you have a problem understanding what is told to you about your (child's) medical condition?

- Always  Often  Sometimes  Occasionally  Never

---

How confident are you filling out medical forms by yourself?

- Not at All  A Little Bit  Somewhat  Quite a Bit  Extremely

## Additional Information

---

What is your relationship to the patient?

- Parent or Legal Guardian
  - Patient
  - Other: Please Specify
- 

---

What is your current age

- Less than 20 years old
  - 20-30 years old
  - 31-40 years old
  - 41-50 years old
  - 51 years or older
- 

---

What is your current marital status?

- Married
  - Living with Partner
  - Divorced
  - Separated
  - Widowed
  - Never Been Married
  - Single
  - Refuse to Answer
- 

---

What is your ethnicity?

- White
  - Black or African-American
  - Asian or Pacific Islander
  - Mixed race
  - Native American
  - Other: Please Specify
- 

---

Is English the primary language spoken in your household?

- Yes
  - No
- 

---

Please provide the primary language

---

---

What is the highest level of school you have completed or the highest degree you have received?

- Less Than a High School Diploma
  - High School/GED
  - 4-year College (Bachelor's Degree)
  - Some College
  - Master's Degree
  - Doctorate (PhD)
  - 2-year College (Associate's)
  - Professional (MD/JD)
- 

---

What is your current employment status?

- Employed full-time
- Employed part-time
- Retired
- Not Employed For Pay
- Self-Employed
- Disabled
- Student
- Other: Please Specify

---

Which of the following types of health insurance is your child covered by?

- Private Insurance Through Employer
- Private Insurance Bought Yourself
- Medicaid
- Medicare
- No Insurance (Self-Pay)
- Any Other Source: Please Specify

---

What was your total family income before taxes last year?

- Less than \$10,000
- \$10,000 to \$20,000
- \$20,000 to \$30,000
- \$30,000 to \$40,000
- \$40,000 to \$75,000
- \$75,000 to \$100,000
- \$100,000 to \$150,000
- \$150,000 or More
- Don't Know
- Refuse to Answer

---

How many adults currently live in your household, including yourself (18 years or older)?

- 1
- 2
- 3
- 4
- 5
- 6 or More

---

How many children live in your household (less than 18 years)?

- 1
- 2
- 3
- 4
- 5
- 6
- 7
- 8
- 9
- 10 or More

---

How often do the children in your household visit any physician (in total)?

- Less Than Yearly
- Yearly
- 2-3 Times Per Year
- 4-5 Times Per Year
- 6-7 Times Per Year
- 8 or More Times Per Year

---

How many visits has your child had with a pediatric surgeon in the past year, including this one?

- 1
- 2
- 3
- 4
- 5
- 6 or More

## Exit Survey

---

In your opinion, did you find today's appointment a valuable use of your time?

- Yes
- No
- Not Answered
